# Supplementary material for: Enhancement of thermal conducting properties in epoxy thermoset systems using an aligned liquid-crystalline mesophase
Source: Royal Society of Chemistry journal article supplement (doi:10.1039/d3ma00585b), 2024-01-01
Supplement: d3ma00585b1.pdf [file d3ma00585b1.pdf]

## Supplementary Information

### Enhancement of Thermal Conducting Properties in Epoxy Thermoset Systems Using an Aligned Liquid-Crystalline Mesophase

*Thi En Trinh,<sup>1</sup> Hyeonuk Yeo<sup>1,2,3,4\*</sup>*

<sup>1</sup>Department of Science Education, <sup>2</sup>Department of Chemistry Education, <sup>3</sup>Department of Pharmacy, <sup>4</sup>Department of Nanoscience and Nanotechnology, Kyungpook National University, 80, Daehak-ro, Buk-gu, Daegu 41566, Republic of Korea

\*E-mail: [yeo@knu.ac.kr](mailto:yeo@knu.ac.kr)

#### Table of Contents

**Figure S1.** NMR spectra of EB-n in CDCl<sub>3</sub>.

**Figure S2.** FT-IR spectra of a) EB-n, b) DEB-n, and c) SEB-n.

**Figure S3.** TGA curves obtained at a heating rate of 20 °C/min: a) EB-n. b) DEB-n. c) SEB-n.

**Table S1.** Thermal decomposition temperature of EB-n.

**Figure S4.** Investigation of the curing reaction by DSC: a,b) DSC curves of DEB-n and SEB-n obtained at a heating rate of 5 °C/min. c,d) Isothermal DSC curves of DEB-n and SEB-n recorded at 182 and 173 °C, respectively.

**Figure S5.** Mesophase images of DEB-n observed by POM during the curing process at 182 °C (scale bar = 100 μm).

**Figure S6.** Mesophase images of SEB-n observed by POM during the curing process at 173 °C (scale bar = 100 μm).

**Figure S7.** Cured sample images of a) DEB-n and b) SEB-n.

**Figure S8.** DSC curves obtained at a heating rate of 5 °C/min: a) Cured DEB-n. b) Cured SEB-n.

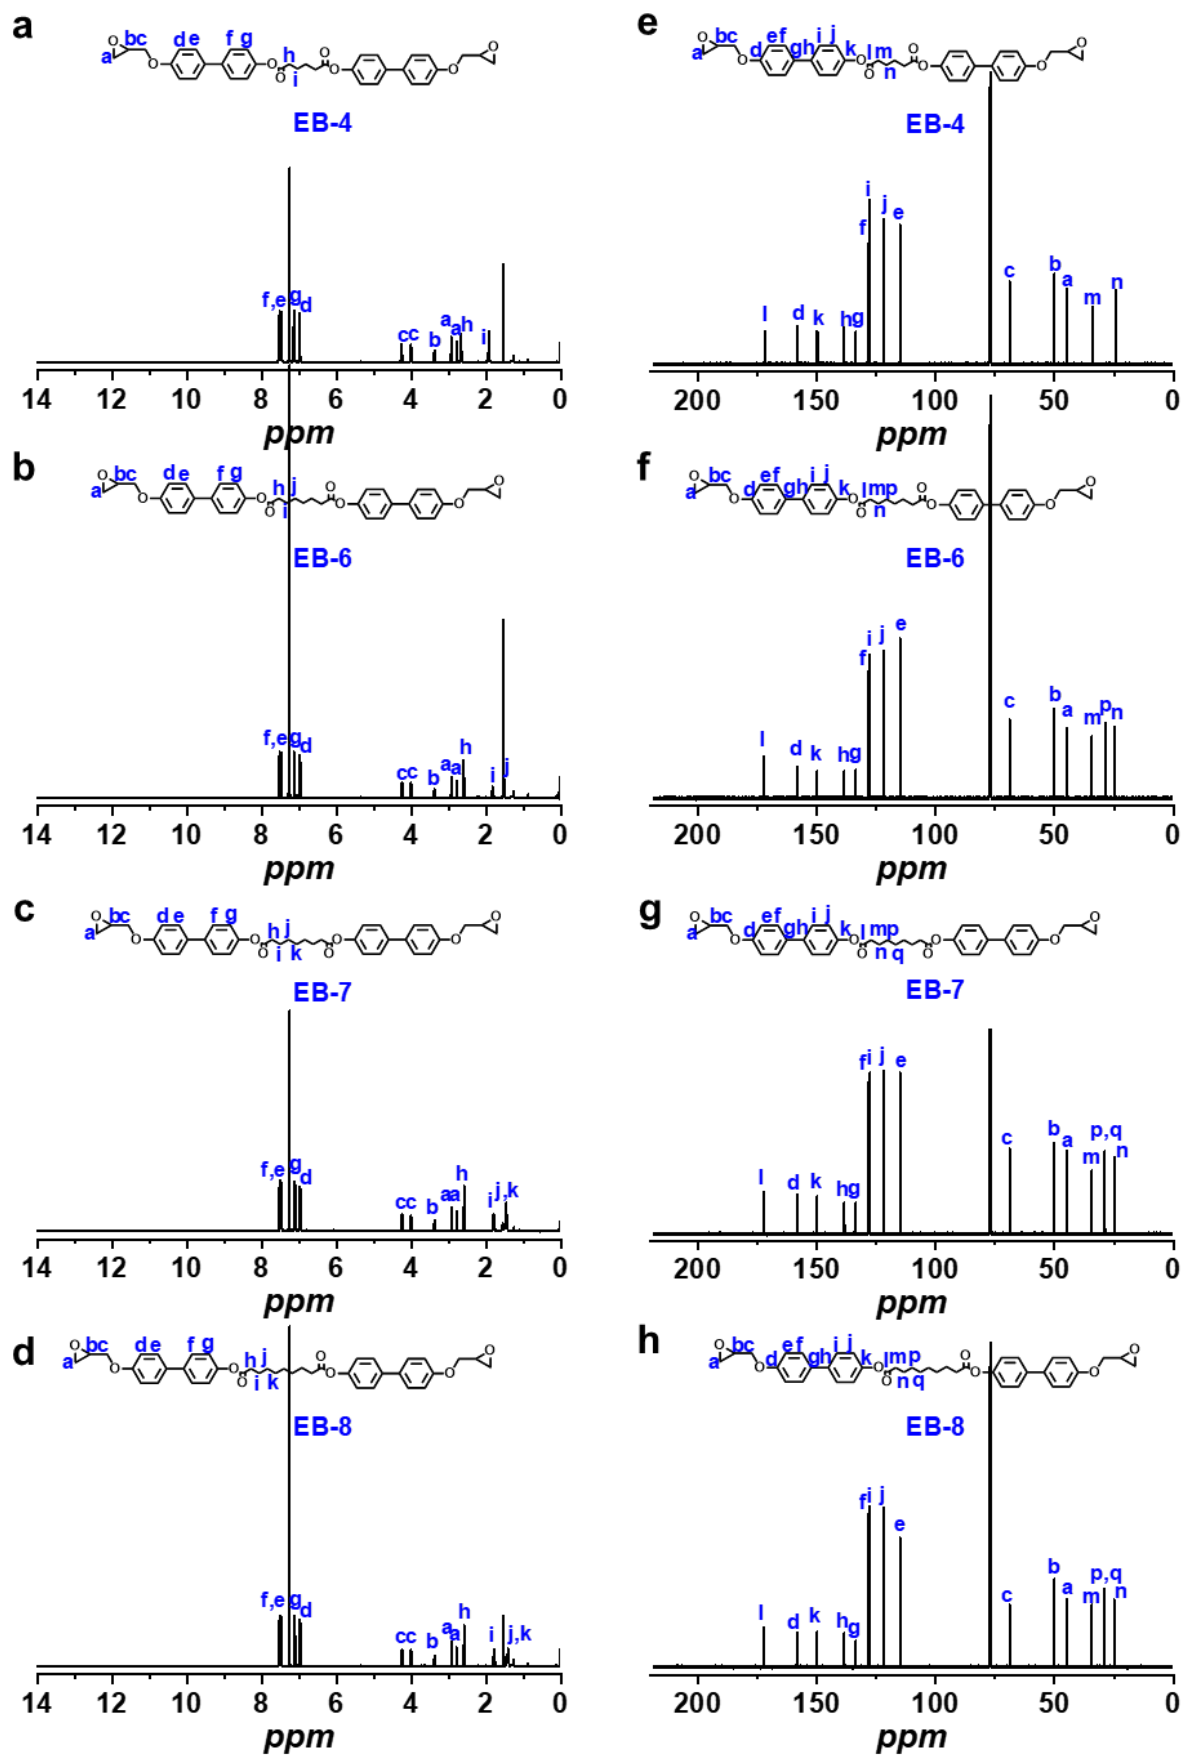

Figure S1. NMR spectra of EB-n in CDCl<sub>3</sub>.

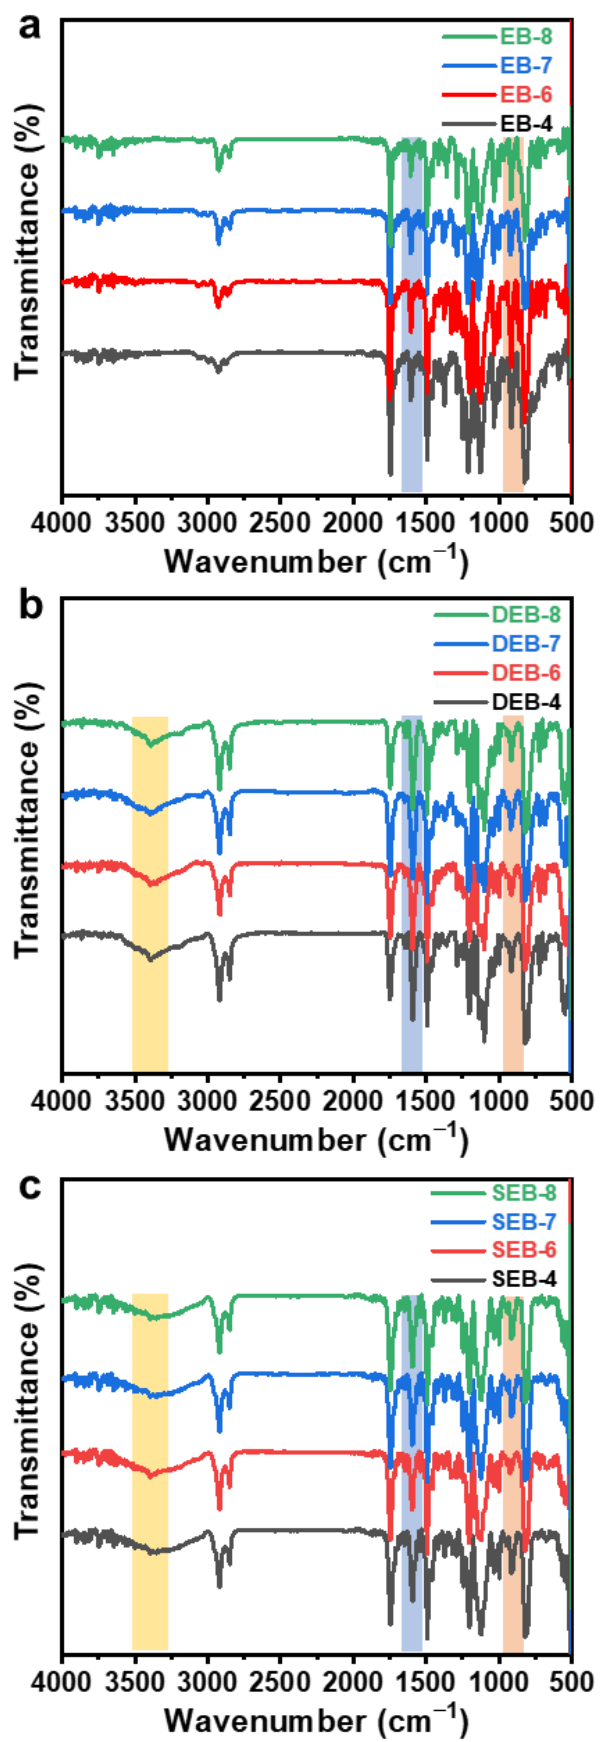

**Figure S2.** FT-IR spectra of a) EB-n, b) DEB-n, and c) SEB-n.

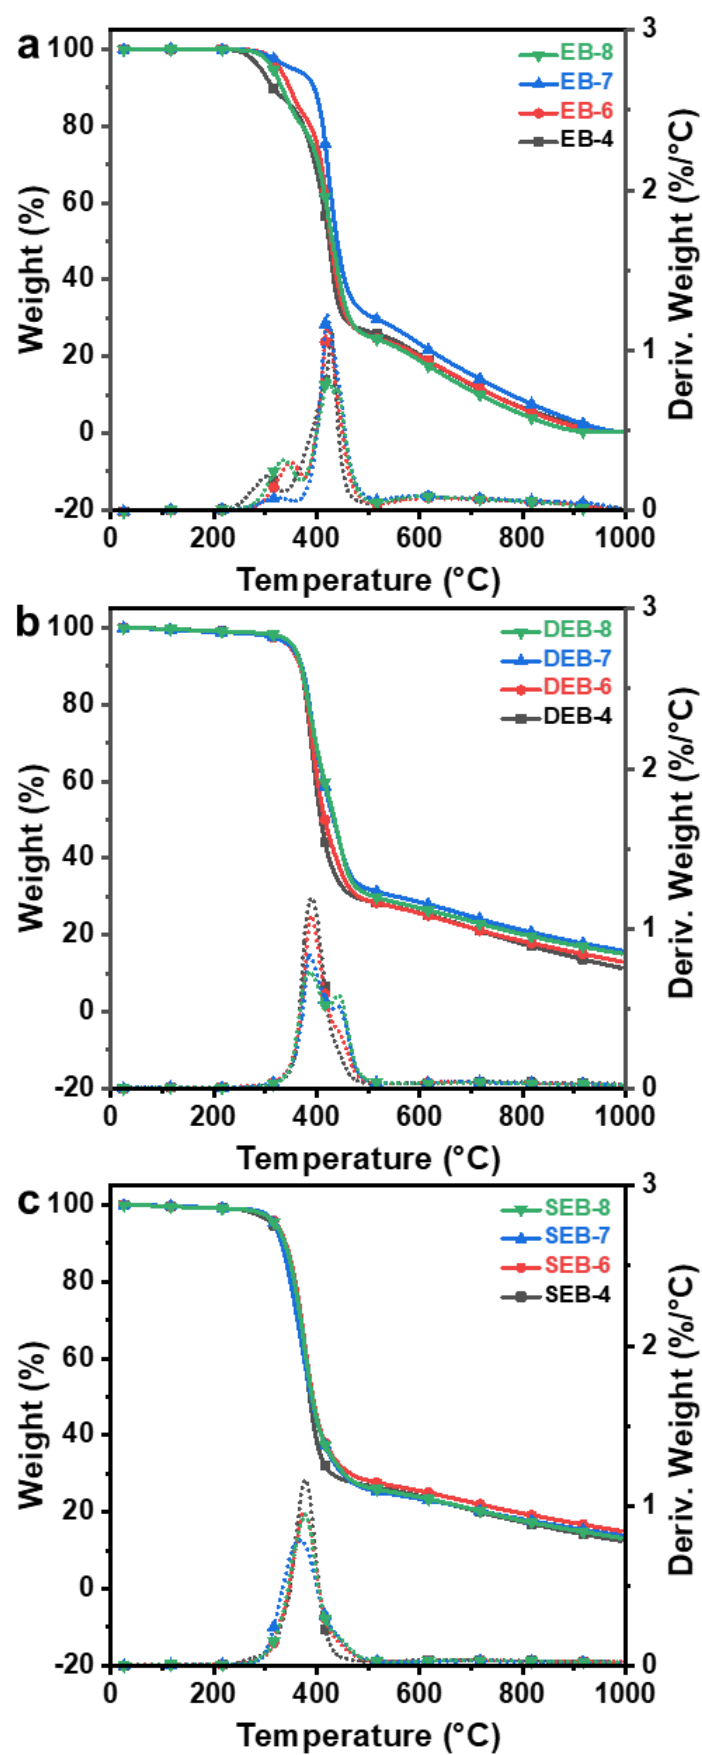

**Figure S3.** TGA curves obtained at a heating rate of 20 °C/min: a) EB-n. b) DEB-n. c) SEB-n.

**Table S1.** Thermal decomposition temperature of EB-n.

| Sample | $T_{d,5\%}^a)$<br>[°C] | $T_{d,10\%}^a)$<br>[°C] |
|--------|------------------------|-------------------------|
| EB-4   | 291.2                  | 316.4                   |
| EB-6   | 330.9                  | 348.5                   |
| EB-7   | 354.7                  | 394.6                   |
| EB-8   | 314.2                  | 332.8                   |

<sup>a)</sup> Determined by TGA curves recorded at a heating rate of 20 °C/min.

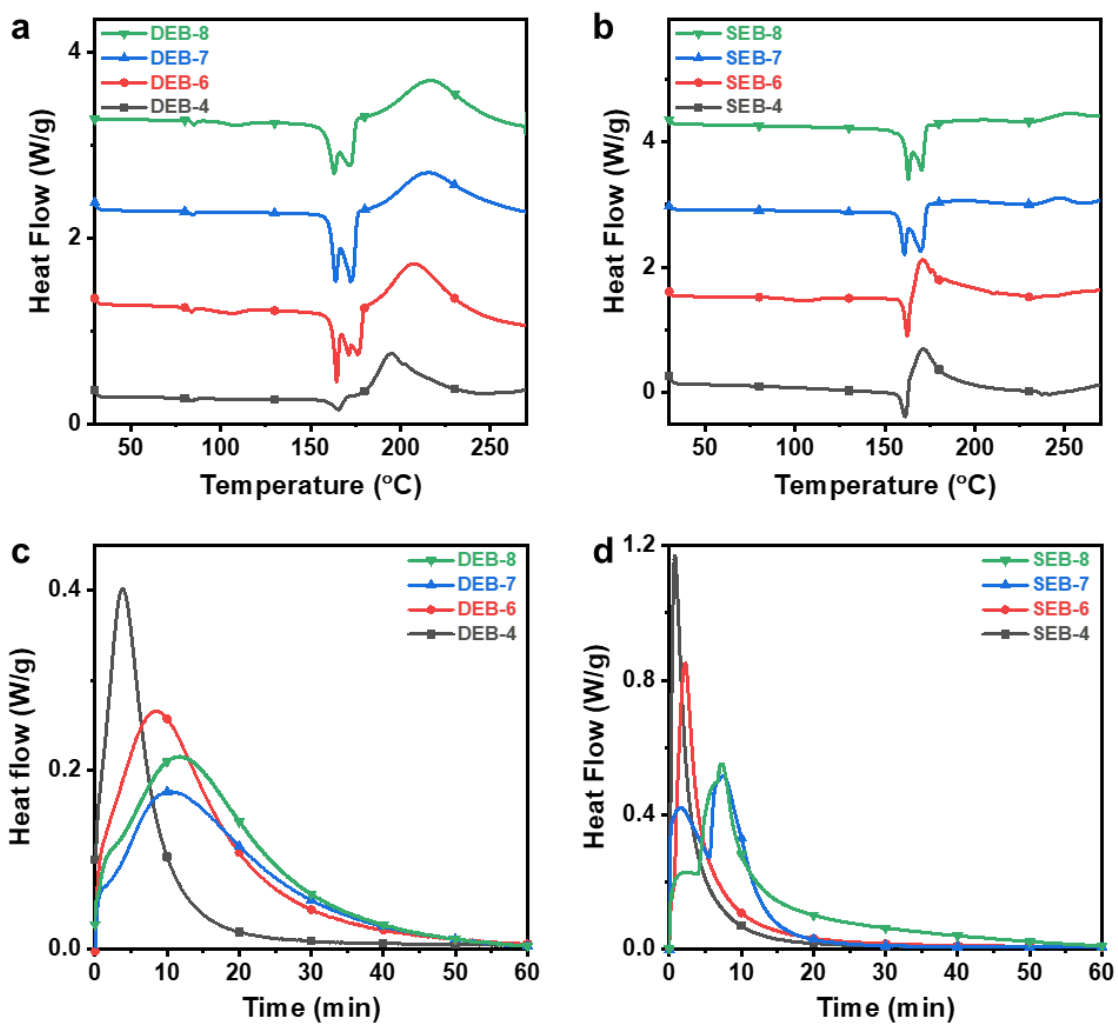

**Figure S4.** Investigation of the curing reaction by DSC: a,b) DSC curves of DEB-n and SEB-n obtained at a heating rate of 5 °C/min. c,d) Isothermal DSC curves of DEB-n and SEB-n recorded at 182 and 173 °C, respectively.

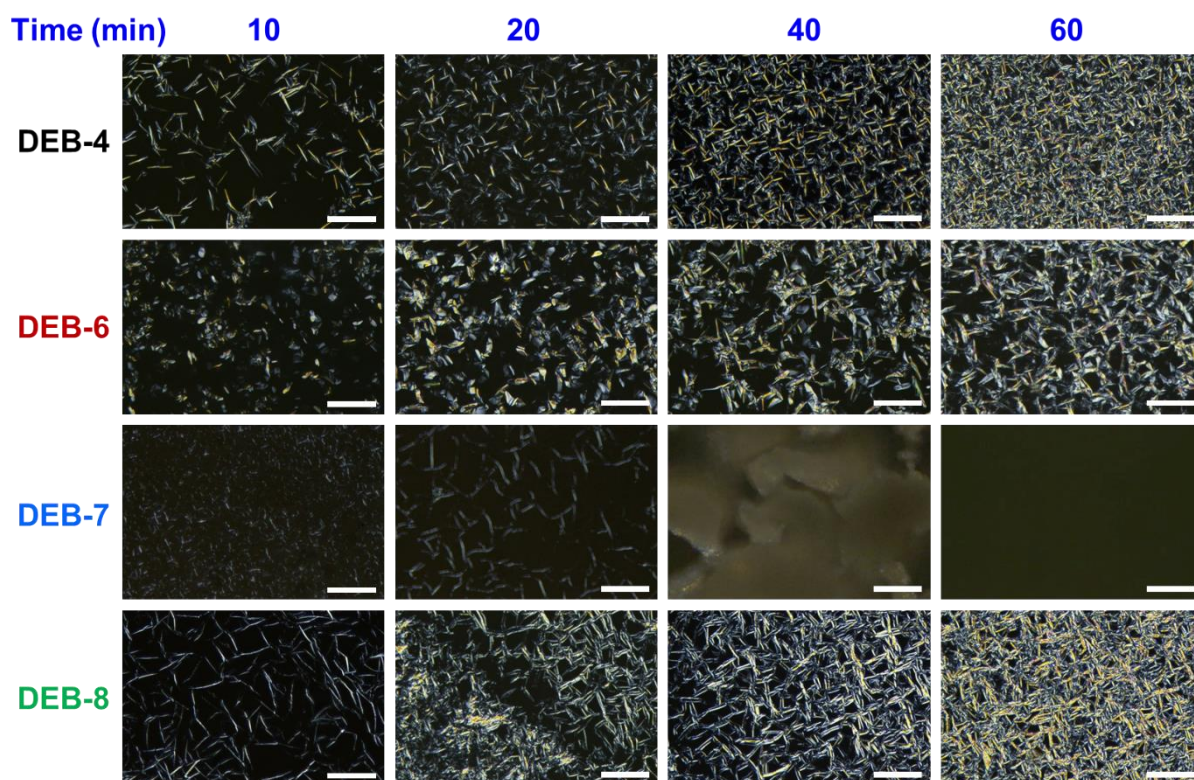

**Figure S5.** Mesophase images of DEB-n observed by POM during the curing process at 182 °C (scale bar = 100  $\mu\text{m}$ ).

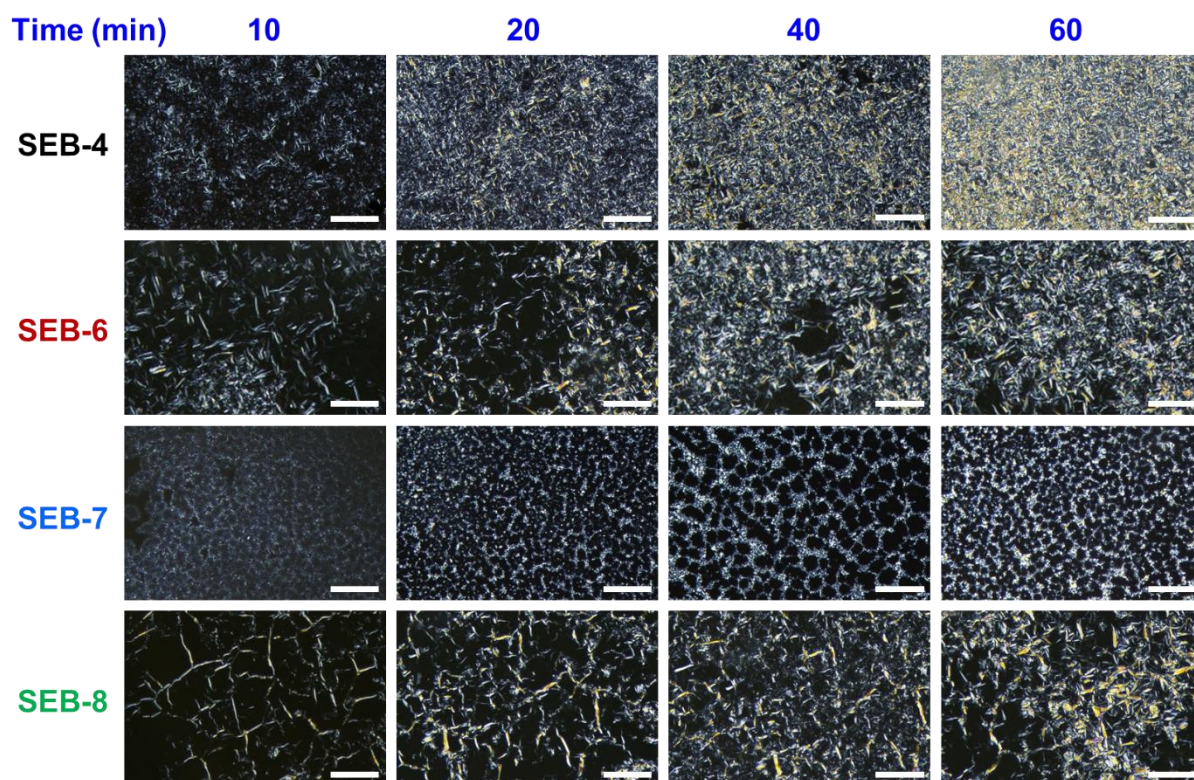

**Figure S6.** Mesophase images of SEB-n observed by POM during the curing process at 173 °C (scale bar = 100  $\mu\text{m}$ ).



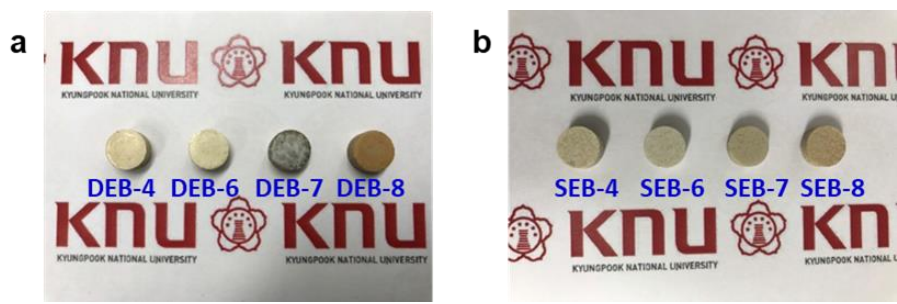

**Figure S7.** Cured sample images of a) DEB-n and b) SEB-n.

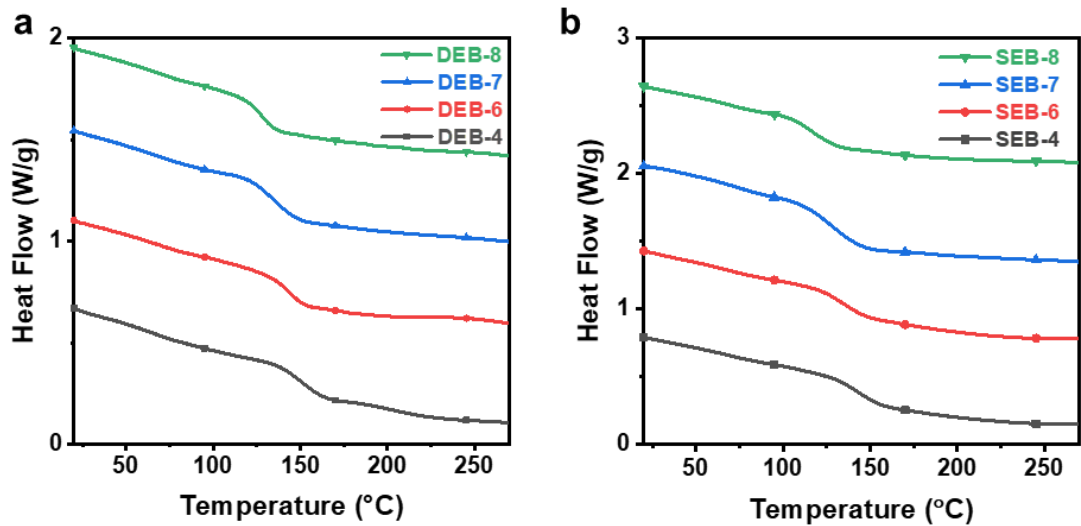

**Figure S8.** DSC curves obtained at a heating rate of 5 °C/min: a) Cured DEB-n. b) Cured SEB-n.
